# Supplementary material for: Combined Effect of Genotype, Housing System, and Calcium on Performance and Eggshell Quality of Laying Hens
Source: PubMed Central journal article supplement (PMC7696842; doi:10.3390/ani10112120), 2020-11-16
Supplement: animals-10-02120-s001.pdf [file animals-10-02120-s001.pdf]

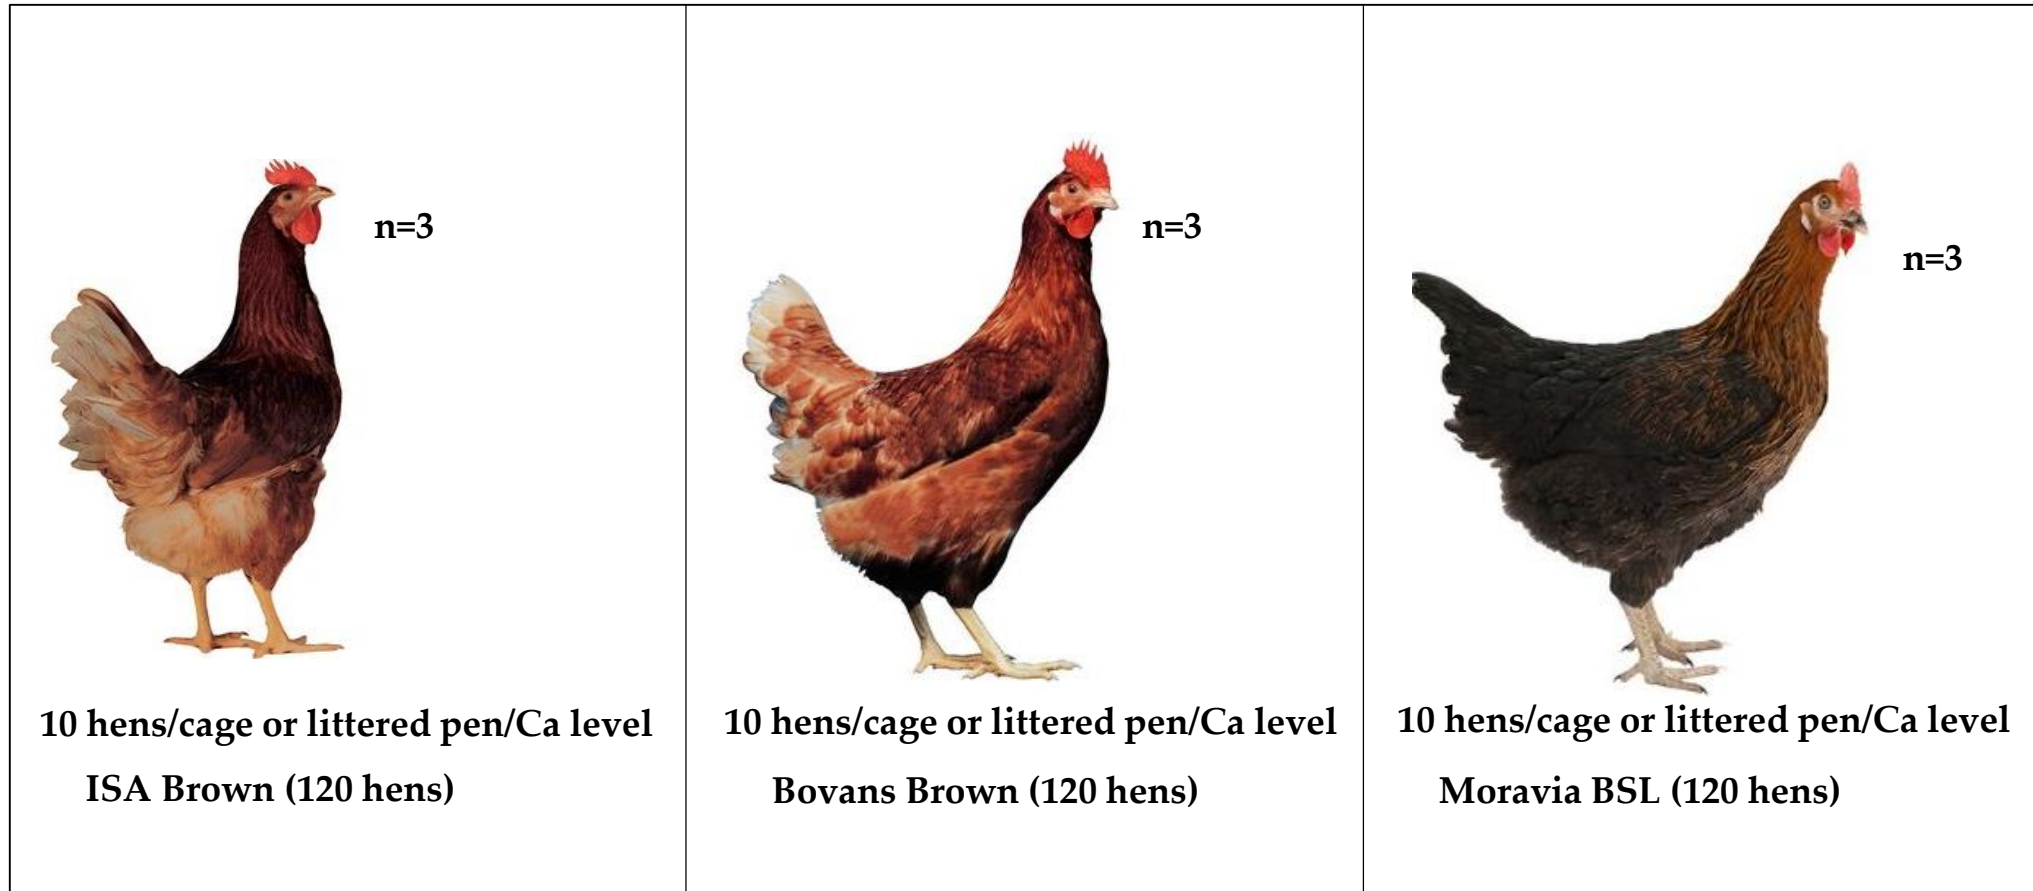

**Figure 1.** Visual representation of the experimental design.
